# Supplementary material
Source: PubMed Central journal article supplement (PMC7597849)
Supplement: NIHMS1638856-supplement-Correction.pdf [file NIHMS1638856-supplement-Correction.pdf]

**Correction:** “Congenital hyperinsulinism as the presenting feature of Kabuki syndrome: clinical and molecular characterization of 10 affected individuals”

Kai Lee Yap, PhD<sup>1,14</sup>, Amy E. Knight Johnson, MSc<sup>1</sup>, David Fischer, BSc<sup>1</sup>, Priscilla Kandikatla, MSc<sup>1</sup>, Jacea Deml, BSc<sup>1</sup>, Viswateja Nelakuditi, MSc<sup>1</sup>, Sara Halbach, MSc<sup>1</sup>, George S. Jeha, MD<sup>2</sup>, Lindsay C. Burrage, MD, PhD<sup>3</sup>, Olaf Bodamer, MD, PhD<sup>4</sup>, Valeria C. Benavides, MD<sup>5</sup>, Andrea M. Lewis, MSc<sup>3</sup>, Sian Ellard, PhD<sup>6</sup>, Pratik Shah, MD<sup>7</sup>, Declan Cody, MD<sup>8</sup>, Alejandro Diaz, MD<sup>9</sup>, Aishwarya Devarajan, MSc<sup>4</sup>, Lisa Truong, MSN<sup>10</sup>, Siri Atma W. Greeley, MD, PhD<sup>11</sup>, Diva D. De Leon, MD<sup>12</sup>, Andrew C. Edmondson, MD, PhD<sup>13</sup>, Soma Das, PhD<sup>1</sup>, Paul Thornton, MD<sup>10</sup>, Darrel Waggoner, MD<sup>1</sup> and Daniela del Gaudio, PhD<sup>1</sup>

*Genetics in Medicine* (2019) 21:262–265; <https://doi.org/10.1038/s41436-018-0126-1>

Correction to: *Genet Med* advance online publication, 15 June 2018; doi: <https://doi.org/10.1038/s41436-018-0013-9>.

The author Diva D. De Leon was incorrectly listed as Diva D. De Leó-Crutchlow in the original version of this paper.

**Reason for correction of manuscript:** Data from Patient 4 and 9 was identified to be derived from the same individual. This patient was born in London, first seen in Great Ormond Street Hospital in London by Dr. Pratik Shah for the initial hyperinsulinism work-up. Subsequently, this patient and her family relocated to the United States and she was seen at Boston Children’s by Dr. Olaf Bodamer where the diagnosis of Kabuki syndrome was made through whole exome sequencing. Unknowingly this patient was aggregated in the data sent from University of Exeter for the manuscript. Due to the initial attribution of the sources from two different geographical locations, the duplication was not detected at the time of manuscript submission. Later the patient was discovered to have been evaluated at both locations and investigations revealed the data duplication.

The following are corrections to our manuscript:

**Corrected Title:** Congenital hyperinsulinism as the presenting feature of Kabuki syndrome: clinical and molecular characterization of 9 affected individuals

**Abstract:** In the methods section the total number of patients with HI and KS is nine instead of ten. In the results section, the number of KDM6A pathogenic variants is n=4 instead of n=5.

**Main text, page 5, last paragraph of Introduction:** Total number of individuals with characterization of presenting features is nine.

**Patients and methods:** Patient 9 to be removed. Patient 10 will be moved up and renamed as Patient 9.

**Results:** Clinical details and genetic findings: Patient 9 to be removed. Patient 10 will be moved up and renamed as Patient 9.

**Discussion:** Nine patients were characterized in the manuscript. Out of the total number of variants identified in KDM6A, two instead of three were truncating variants. Total size of cohort found to have KS and hyperinsulinism (including the case identified from analysis

<sup>1</sup>Department of Human Genetics, University of Chicago Genetic Services Laboratory, The University of Chicago, Chicago, Illinois, USA; <sup>2</sup>Pediatric Diabetes and Endocrinology, Texas Children’s Hospital, Houston, Texas, USA; <sup>3</sup>Department of Molecular and Human Genetics, Baylor College of Medicine, Houston, Texas, USA; <sup>4</sup>Division of Genetics and Genomics, Boston Children’s Hospital, Harvard Medical School, Boston, Massachusetts, USA; <sup>5</sup>Division of Pediatric Endocrinology, University of Illinois College of Medicine, Peoria, Illinois, USA; <sup>6</sup>Institute of Biomedical and Clinical Science, University of Exeter Medical School, Newcastle upon Tyne, UK; <sup>7</sup>Great Ormond Street Hospital, London, UK; <sup>8</sup>Our Lady’s Children’s Hospital, Crumlin, Dublin, Ireland; <sup>9</sup>Pediatric Endocrinology, Pediatric Specialists of America, Nicklaus Children’s Hospital, Miami, Florida, USA; <sup>10</sup>Cook Children’s Medical Center, Fort Worth, Texas, USA; <sup>11</sup>Department of Pediatrics and Medicine, The University of Chicago Medicine, Chicago, Illinois, USA; <sup>12</sup>Department of Pediatrics, Divisions of Endocrinology and Genetics, The Children’s Hospital of Philadelphia and Perelman School of Medicine at the University of Pennsylvania, Philadelphia, Pennsylvania, USA; <sup>13</sup>Division of Human Genetics, Department of Pediatrics, The Children’s Hospital of Philadelphia, Philadelphia, Pennsylvania, USA; <sup>14</sup>Present address: Department of Pathology and Laboratory Medicine, Ann & Robert H. Lurie Children’s Hospital of Chicago, Chicago, Illinois, USA. Correspondence: Daniela del Gaudio (ddelgaudio@bsd.uchicago.edu)

of 100 additional samples) is n=10, with 4 pathogenic variants in KDM6A (40%), which is still an evident enrichment over the general frequency of KDM6A pathogenic variants (2-8%) in KS. Finally, 8 out of 9 of the KS patients with HI were responsive to diazoxide treatment instead of 9 out of 10, reinforcing the same conclusion that the hypoglycemia in these patients were adequately managed with diazoxide, and that a timely diagnosis will be key to improving outcomes.

**Table 1 Clinical history of 9 patients who presented with CHI**

|                                                             | Patient 1                                                      | Patient 2                                                                                                                                                                                                     | Patient 3                                                                                   | Patient 4                                                                         | Patient 5                       |
|-------------------------------------------------------------|----------------------------------------------------------------|---------------------------------------------------------------------------------------------------------------------------------------------------------------------------------------------------------------|---------------------------------------------------------------------------------------------|-----------------------------------------------------------------------------------|---------------------------------|
| <b>Current Age</b>                                          | 8 months                                                       | 18 months                                                                                                                                                                                                     | 13 months                                                                                   | 14 months                                                                         | 5 years                         |
| <b>Gender</b>                                               | Male                                                           | Female                                                                                                                                                                                                        | Male                                                                                        | Female                                                                            | Male                            |
| <b>Ethnicity &amp; Family history</b>                       | Italian/German/Slovakian, non-consanguineous                   | Caucasian parents, maternal depression, history of alcohol abuse/dependence, gastric bypass, epilepsy, tobacco use 1/2 pack per day. Paternal heart condition, hypertrophic cardiomyopathy with defibrillator | Hispanic/Latino, maternal family history of asthma, paternal diabetes age of onset 28 years | Italian/Iranian, non-consanguineous                                               | Hispanic, non-consanguineous    |
| <b>Age at delivery</b>                                      | 37 5/7 weeks via <sup>a</sup> NSVD to G1P0 28 years-old mother | 38 6/7 weeks via NSVD to G5P0040 36 years-old mother                                                                                                                                                          | 39 6/7 weeks via NSVD to G2P2 24 years-old mother                                           | 39 4/7 weeks via NSVD                                                             | 39 weeks via NSVD               |
| <b>Birth weight</b>                                         | 6 lbs 15 oz                                                    | 7lbs 3oz                                                                                                                                                                                                      | 7lbs 8oz                                                                                    | 6 lbs 0.7 oz                                                                      | 7lbs 8oz                        |
| <b>Perinatal complications</b>                              | Tachypnea requiring <sup>b</sup> CPAP, hypoglycemia            | Increased work of breathing after feeding                                                                                                                                                                     | Desaturations on <sup>c</sup> DOL3                                                          | <sup>d</sup> IUGR at 32 weeks                                                     | -                               |
| <b>Presentation of hypoglycemia</b>                         | DOL1                                                           | DOL1                                                                                                                                                                                                          | DOL1                                                                                        | DOL1                                                                              | DOL8                            |
| <b>Plasma glucose (mg/dL) Ref: 80-120 [Lowest recorded]</b> | 51 [29]                                                        | 21 [21]                                                                                                                                                                                                       | 44 [12]                                                                                     | 75.6 [25.2/34.2]                                                                  | 47 [40]                         |
| <b>Insulin (uIU/ml = mU/L)</b>                              | 10.9                                                           | 8.1                                                                                                                                                                                                           | 3.9                                                                                         | 16.3                                                                              | 40                              |
| <b>Beta hydroxybutyrate (mmol/L)</b>                        | 0.04                                                           | NA                                                                                                                                                                                                            | 0.15                                                                                        | NA                                                                                | 0.04                            |
| <b>Free fatty acids (mmol/L)</b>                            | 0.28                                                           | NA                                                                                                                                                                                                            | NA                                                                                          | NA                                                                                | NA                              |
| <b>Glycemic response to glucagon (mg/dL)</b>                | 70                                                             | 110 (taken during assessment for response to diazoxide)                                                                                                                                                       | Response to glucagon noted but no value available                                           | NA                                                                                | 20                              |
| <b>Treatment of hypoglycemia</b>                            | Diazoxide 4.5 mg/kg/day. Started at 15 mg/kg/day               | Diazoxide 5 mg/kg/day                                                                                                                                                                                         | Diazoxide 4 mg/kg/day                                                                       | Initially with chlorothiazide 0.2 ml twice/day, diazoxide 3 mg/kg three times/day | Diazoxide until 3 months of age |
| <b>Was normoglycemia achieved?</b>                          | Yes                                                            | Yes                                                                                                                                                                                                           | Yes                                                                                         | Yes                                                                               | Yes                             |

  

|                                                             | Patient 6                                                | Patient 7                                                      | Patient 8                                                   | Patient 9                                                                                                                        |
|-------------------------------------------------------------|----------------------------------------------------------|----------------------------------------------------------------|-------------------------------------------------------------|----------------------------------------------------------------------------------------------------------------------------------|
| <b>Current Age</b>                                          | 3 years                                                  | 9 months                                                       | 18 months                                                   | 7 months                                                                                                                         |
| <b>Gender</b>                                               | Female                                                   | Male                                                           | Female                                                      | Male                                                                                                                             |
| <b>Ethnicity &amp; Family history</b>                       | Caucasian                                                | Asian                                                          | Caucasian, non-consanguineous                               | Ecuadorian                                                                                                                       |
| <b>Age at delivery</b>                                      | 39 weeks via NSVD                                        | 37 weeks via C-section due to non-reassuring fetal heart tones | 39 1/7 weeks via elective C-section for breech presentation | 38 weeks via C-section                                                                                                           |
| <b>Birth weight</b>                                         | 7lbs 14oz                                                | 5lbs 5oz                                                       | 11lb 2oz                                                    | 6 lbs 8oz                                                                                                                        |
| <b>Perinatal complications</b>                              | Polyhydramnios with tobacco use and asthma in the mother | Single umbilical artery, IUGR, and nuchal cord                 | <sup>d</sup> PPHN requiring sildenafil                      | 15 day NICU stay for respiratory distress colostomy at DOL1, Surgeries: colostomy, <sup>e</sup> PSARP, g-tube and fundoplication |
| <b>Presentation of hypoglycemia</b>                         | DOL7                                                     | DOL7                                                           | DOL1                                                        | Likely early DOL but only discovered while coming from Ecuador for ostomy reversal during pre-operative work at 7 months-old     |
| <b>Plasma glucose (mg/dL) Ref: 80-120 [Lowest recorded]</b> | 35 [31]                                                  | 46 [30]                                                        | 17                                                          | 41 [33]                                                                                                                          |
| <b>Insulin (uIU/ml = mU/L)</b>                              | 8.8                                                      | 1                                                              | 8.5                                                         | 6.9                                                                                                                              |
|                                                             | 0.21                                                     | 0.22                                                           | 0.6                                                         | 0.6                                                                                                                              |

**Table 1** continued

|                                              | Patient 6                                                                                                                                                     | Patient 7                                                                                                                                                           | Patient 8                                         | Patient 9                            |
|----------------------------------------------|---------------------------------------------------------------------------------------------------------------------------------------------------------------|---------------------------------------------------------------------------------------------------------------------------------------------------------------------|---------------------------------------------------|--------------------------------------|
| <b>Beta hydroxybutyrate (mmol/L)</b>         |                                                                                                                                                               |                                                                                                                                                                     |                                                   |                                      |
| <b>Free fatty acids (mmol/L)</b>             | 1.82                                                                                                                                                          | NA                                                                                                                                                                  | 0.3                                               | 1.3                                  |
| <b>Glycemic response to glucagon (mg/dL)</b> | 42                                                                                                                                                            | 82                                                                                                                                                                  | NA                                                | 80                                   |
| <b>Treatment of hypoglycemia</b>             | Diazoxide (partially responsive), octreotide, pancreatectomy due to diffuse disease, at 3 years old managed with Somatuline, g- button feeds, overnight feeds | Diazoxide, responsive and well controlled. At 4 months of age stopped due to pulmonary hypertension. Solcarb to help maintain blood glucose. Now managed with feeds | Partial pancreatectomy and Diazoxide 10 mg/kg/day | Diazoxide 10 mg/kg three times a day |
| <b>Was normoglycemia achieved?</b>           | No                                                                                                                                                            | Yes                                                                                                                                                                 | Yes                                               | Yes                                  |

<sup>a</sup> NSVD: Normal spontaneous vaginal delivery;

<sup>b</sup> CPAP: Continuous positive airway pressure;

<sup>d</sup> IUGR: intrauterine growth retardation;

<sup>c</sup> DOL: Day of life;

<sup>d</sup> PPHN: Persistent Newborn Pulmonary Hypertension;

<sup>e</sup> PSARP: Posterior Sagittal Anorectoplasty.

Note: Laboratory values for plasma glucose, insulin, beta-hydroxybutyrate, and free fatty acids were recorded during a critical sample collection.

**Table 2 : Kabuki syndrome features of the 9 patients**

| Features                   | Patient 1                                                                                                                               | Patient 2                                                                                 | Patient 3                                                                              | Patient 4                                                                                                                                   | Patient 5                                                     |
|----------------------------|-----------------------------------------------------------------------------------------------------------------------------------------|-------------------------------------------------------------------------------------------|----------------------------------------------------------------------------------------|---------------------------------------------------------------------------------------------------------------------------------------------|---------------------------------------------------------------|
| <b>Age of KS diagnosis</b> | 2 months                                                                                                                                | 18 months                                                                                 | 6 months                                                                               | 6 months                                                                                                                                    | 1 year                                                        |
| <b>Genotype</b>            | Mosaic hemizygous deletion of <i>KDM6A</i> exons 3-24 arr[hg19]Xp11.3 (44818602_44947539)x0                                             | <i>De novo</i> deletion of <i>KDM6A</i> exons 7-17 arr[hg19] Xp11.3 (44892185_44935785)x1 | <i>De novo</i> <i>KMT2D</i> c.603_604dup (p. Gly202Alafs*7)                            | <i>De novo</i> <i>KDM6A</i> c.357C>G (p. Tyr119*)                                                                                           | <i>De novo</i> <i>KMT2D</i> c.11149C>T (p. Gln3717*)          |
| <b>Facial</b>              | Long palpebral fissures                                                                                                                 | Long eyelashes, low set ears, Protruding ear lobes                                        | Long palpebral fissures with lateral eversion of eyelid                                | Long palpebral fissures, eversion of lateral third of lower eyelid, arched/sparse eyebrows, depressed/flat nasal tip, large/dysmorphic ears | Long palpebral fissures, short nasal septum, arching eyebrows |
| <b>Eye</b>                 | Left homonymous hemianopsia visual field defect, exotropia (since resolved), and bilateral hyperopia                                    | Left-side strabismus                                                                      | –                                                                                      | –                                                                                                                                           | –                                                             |
| <b>Oral</b>                | Thin upper lip vermilion                                                                                                                | –                                                                                         | Thin upper lip vermilion                                                               | –                                                                                                                                           | –                                                             |
| <b>Skeletal</b>            | Hip dysplasia                                                                                                                           | –                                                                                         | Sacral dimple with hair tuft                                                           | Hip dysplasia                                                                                                                               | –                                                             |
| <b>Hand</b>                | –                                                                                                                                       | Fleshy finger pads                                                                        | 5th finger clinodactyly, tapering fingers, abnormal palmar creases, fleshy finger pads | Fetal fingertip pads                                                                                                                        | –                                                             |
| <b>Neurological</b>        | Congenital partial agenesis of the corpus callosum with right paramedian posterior interhemispheric cyst, developmental delay, seizures | Decreased symmetric muscle tone and strength                                              | Developmental delay                                                                    | Neonatal hypotonia                                                                                                                          | Hearing loss, developmental delay                             |
| <b>Cardiovascular</b>      | Small atrial septal defect and resolving bi-ventricular hypertrophy                                                                     | –                                                                                         | –                                                                                      | –                                                                                                                                           | Atrial septal defect                                          |
| <b>Gastrointestinal</b>    | Feeding difficulties and gastroesophageal reflux                                                                                        | –                                                                                         | Feeding difficulties                                                                   | Feeding difficulties and gastroesophageal reflux                                                                                            | Feeding difficulties                                          |
| <b>Urogenital</b>          | –                                                                                                                                       | –                                                                                         | Dysplastic left kidney, renal cysts in right                                           | –                                                                                                                                           | –                                                             |
| <b>Endocrine</b>           | Short stature: height < 5th percentile                                                                                                  | –                                                                                         | Short stature: 5th percentile in height                                                | Short stature                                                                                                                               | –                                                             |

  

| Features                   | Patient 6                                                | Patient 7                                            | Patient 8                                                            | Patient 9                                                       |
|----------------------------|----------------------------------------------------------|------------------------------------------------------|----------------------------------------------------------------------|-----------------------------------------------------------------|
| <b>Age of KS diagnosis</b> | 15–18 months                                             | 9 months                                             | 11 months                                                            | 7 months                                                        |
| <b>Genotype</b>            | <i>De novo</i> <i>KMT2D</i> c.709del (p. Glu237Serfs*24) | <i>De novo</i> <i>KMT2D</i> c.8366G>A (p.Arg2789Gln) | <i>De novo</i> <i>KDM6A</i> c.2074_2075del (p. Gln692Glyfs*37)       | <i>De novo</i> <i>KMT2D</i> c.6613delinsAA, (p.Ala2205Asnfs*38) |
| <b>Facial</b>              | Long palpebral fissures, short nasal septum, low set ear | Long palpebral fissures                              | Depressed nasal bridge                                               | Arched eyebrows                                                 |
| <b>Eye</b>                 | –                                                        | –                                                    | Prominent eyes                                                       | Long eyelashes, blue sclerae                                    |
| <b>Oral</b>                | –                                                        | –                                                    | Small jaw                                                            | –                                                               |
| <b>Skeletal</b>            | –                                                        | Sacral dimple                                        | Left <sup>a</sup> DDH with Palvik Harness                            | –                                                               |
| <b>Hand</b>                | –                                                        | –                                                    | –                                                                    | –                                                               |
| <b>Neurological</b>        | Hearing loss, developmental delay                        | Developmental delay                                  | Sacral dimple                                                        | Developmentally delayed                                         |
| <b>Cardiovascular</b>      | –                                                        | One umbilical artery                                 | <sup>b</sup> PDA and small <sup>c</sup> PFO with mild concentric LVH | Heart murmur, Ventricular septal defect                         |
| <b>Gastrointestinal</b>    | Feeding difficulties                                     | Feeding difficulties                                 | Feeding difficulties<br>Cows milk protein intolerance                | Imperforate anus, GERD                                          |
| <b>Urogenital</b>          | –                                                        | –                                                    | –                                                                    | Undescended testes                                              |
| <b>Endocrine</b>           | –                                                        | –                                                    | Premature thelarche                                                  | Low weight and height                                           |

<sup>a</sup> DDH: Developmental dysplasia of the hip

<sup>b</sup> PDA: Patent ductus arteriosus;

<sup>c</sup> PFO: Patent foramen ovale

The reference sequence used for *KDM6A* is NM\_021140.3. The reference sequence used for *KMT2D* is NM\_003482.3.
